# Supplementary material
Source: PubMed Central journal article supplement (PMC9296065)
Supplement: NIHMS1808049-supplement-2.pdf [file NIHMS1808049-supplement-2.pdf]

| Item Name                                      | Quantity | Measure     | Wgt (g) | Cals (kcal) | FatCals (kcal) | SatCals (kcal) | Prot (g) | Carb (g) | TotFib (g) |
|------------------------------------------------|----------|-------------|---------|-------------|----------------|----------------|----------|----------|------------|
| 1 Bag Totals                                   |          |             | 294.44  | 422         | 148            | 43.7           | 15.72    | 54.2     | 3.22       |
| rice, basmati, white, cooked                   | 65       | Gram        | 65      | 83.9        | 1.64           | 0.45           | 1.74     | 18.2     | 0.26       |
| cheese, parmesan                               | 7        | Gram        | 7       | 27.5        | 15.75          | 9              | 2.5      | 0        | 0          |
| broccoli florets, steamed                      | 12.5     | Gram        | 12.5    | 4.28        | 0.46           | 0.08           | 0.29     | 0.88     | 0.4        |
| carrots, cooked                                | 12.5     | Gram        | 12.5    | 4.37        | 0.2            | 0.03           | 0.09     | 1.03     | 0.38       |
| corn, sweet, frozen, premium, organic          | 22.5     | Gram        | 22.5    | 18.5        | 2.38           | 0              | 0.79     | 4.76     | 0.53       |
| hot dog, chicken & pork, classic, bun size     | 12.5     | Gram        | 12.5    | 30.7        | 23.4           | 8.49           | 1.18     | 0.47     | 0          |
| oil, soybean                                   | 2.5      | Gram        | 2.5     | 22.1        | 22.1           | 3.52           | 0        | 0        | 0          |
| potato, red bliss, roasted                     | 12.5     | Gram        | 12.5    | 23.33       | 13.5           | 1.5            | 0.33     | 2        | 0.17       |
| chicken breast, seasoned, rotisserie, skinless | 23       | Gram        | 23      | 31.51       | 5.78           | 1.6            | 6.44     | 0        | 0          |
| almonds, dry roasted                           | 2.5      | Gram        | 2.5     | 15.0        | 11.8           | 0.92           | 0.52     | 0.53     | 0.27       |
| bouillon, chicken                              | 2.5      | Gram        | 2.5     | 0.15        | 0.05           | 0              | 0.02     | 0.01     | 0          |
| salt, table                                    | 0.5      | Gram        | 0.5     | 0           | 0              | 0              | 0        | 0        | 0          |
| stock, chicken                                 | 7.5      | Gram        | 7.5     | 1.41        | 0.28           | 0              | 0.25     | 0.03     | 0.03       |
| onion, sauteed, from fresh                     | 27.5     | Gram        | 27.5    | 12.1        | 0.47           | 0.08           | 0.37     | 2.78     | 0.39       |
| juice, orange                                  | 2        | Fluid ounce | 59.1    | 27.6        | 0              | 0              | 0.39     | 6.71     | 0          |
| cookie, chocolate chip, Chips Ahoy!, mini      | 4        | Each        | 24.8    | 120         | 50.4           | 18             | 0.8      | 16.8     | 0.8        |
| <b>Total</b>                                   | 216.5    |             | 588.88  | 845         | 296            | 87.34          | 31.43    | 108.9    | 6.45       |

**Table S1, Related to Figure 1: Food composition of the homogenous diet intervention**

| Class | Time point<br>1 (0) | Time point<br>4 (1) | Class Error | type              |
|-------|---------------------|---------------------|-------------|-------------------|
| 0     | 11                  | 6                   | 0.35        | Macronutrients    |
| 1     | 4                   | 13                  | 0.24        | Macronutrients    |
| 0     | 10                  | 7                   | 0.41        | ASVs              |
| 1     | 9                   | 8                   | 0.53        | ASVs              |
| 0     | 11                  | 6                   | 0.35        | Fecal-metabolome  |
| 1     | 5                   | 12                  | 0.29        | Fecal-metabolome  |
| 0     | 12                  | 5                   | 0.29        | Plasma-metabolome |
| 1     | 3                   | 14                  | 0.18        | Plasma-metabolome |
| 0     | 9                   | 8                   | 0.47        | Urine-metabolome  |
| 1     | 5                   | 12                  | 0.29        | Urine-metabolome  |

**Table S2, Related to Figure 3: Classification error for random forest models**

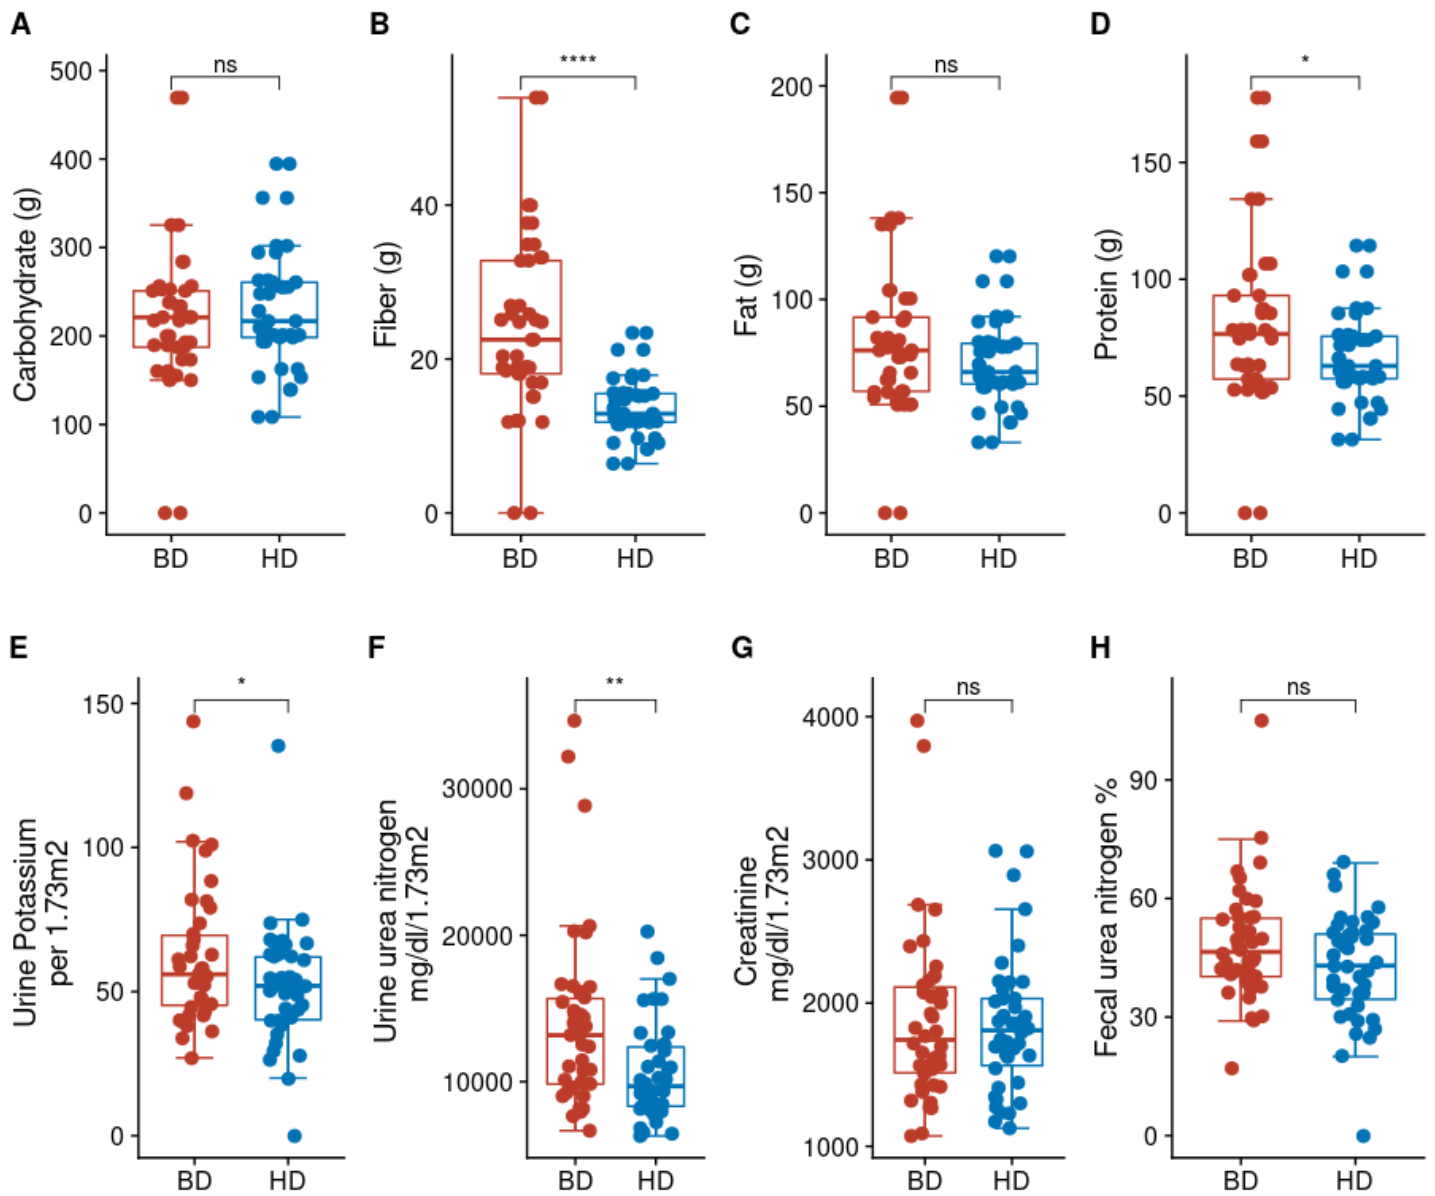

**Figure S1, Related to Figure 1: Macronutrient and clinical parameters between BD and HD**

Mean (A) carbohydrate, (B) fiber, (C) fat, and (D) protein intake during the BD and HD phases.

Participants (E) urine potassium, (F) urine urea nitrogen, (G) creatinine, and (H) fecal urea nitrogen quantified at all study phases.

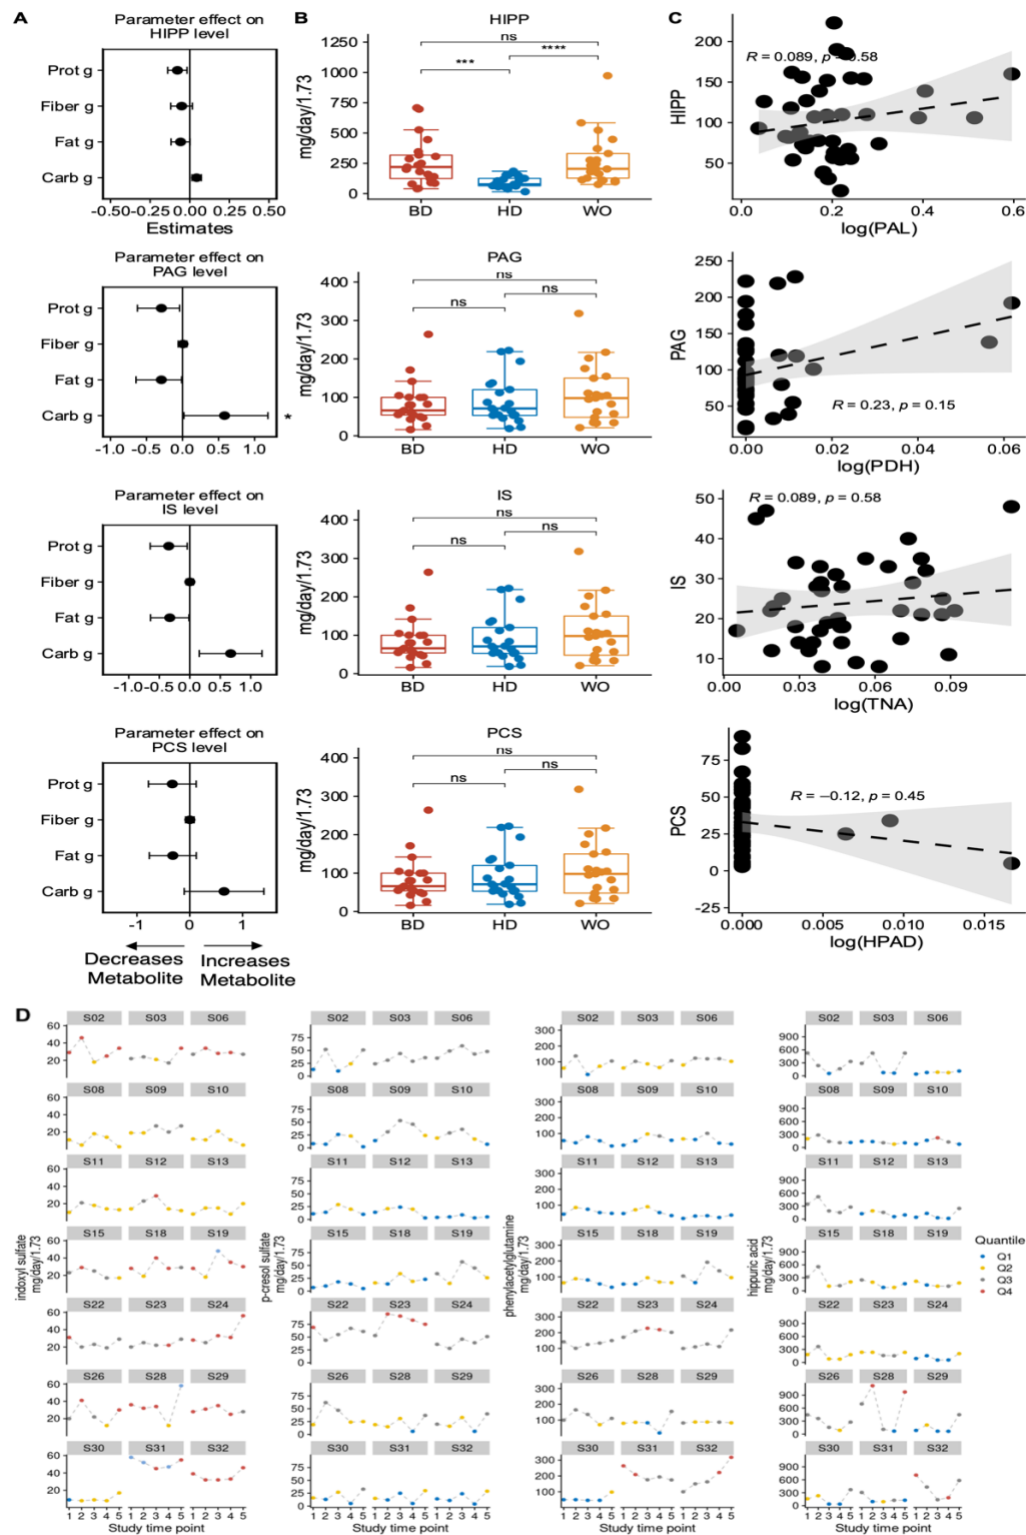

**Figure S2, Related to Figure 2: Primary outcome uremic solute levels and correspondence with microbiome encoded metabolism**

**(A)** Effect sizes of contribution of dietary macronutrients to hippuric acid (HIPP), phenylacetylglutamine (PAG), indoxyl sulfate (IS), and *p*-cresol sulfate (PCS) levels quantified by a mixed-effects model (bars represent a 95% CI). **(B)** Mean HIPP, PAG, IS, and PCS levels (mg/day/1.73) at the BD, HD, and WO phases.

**(C)** Correlation between urine IS, PAG, PCS levels with the relative abundances of the microbiome-encoded enzyme involved in their production.

(D) Uremic solute levels over the course of the MISO study by subject and colored by tertile.

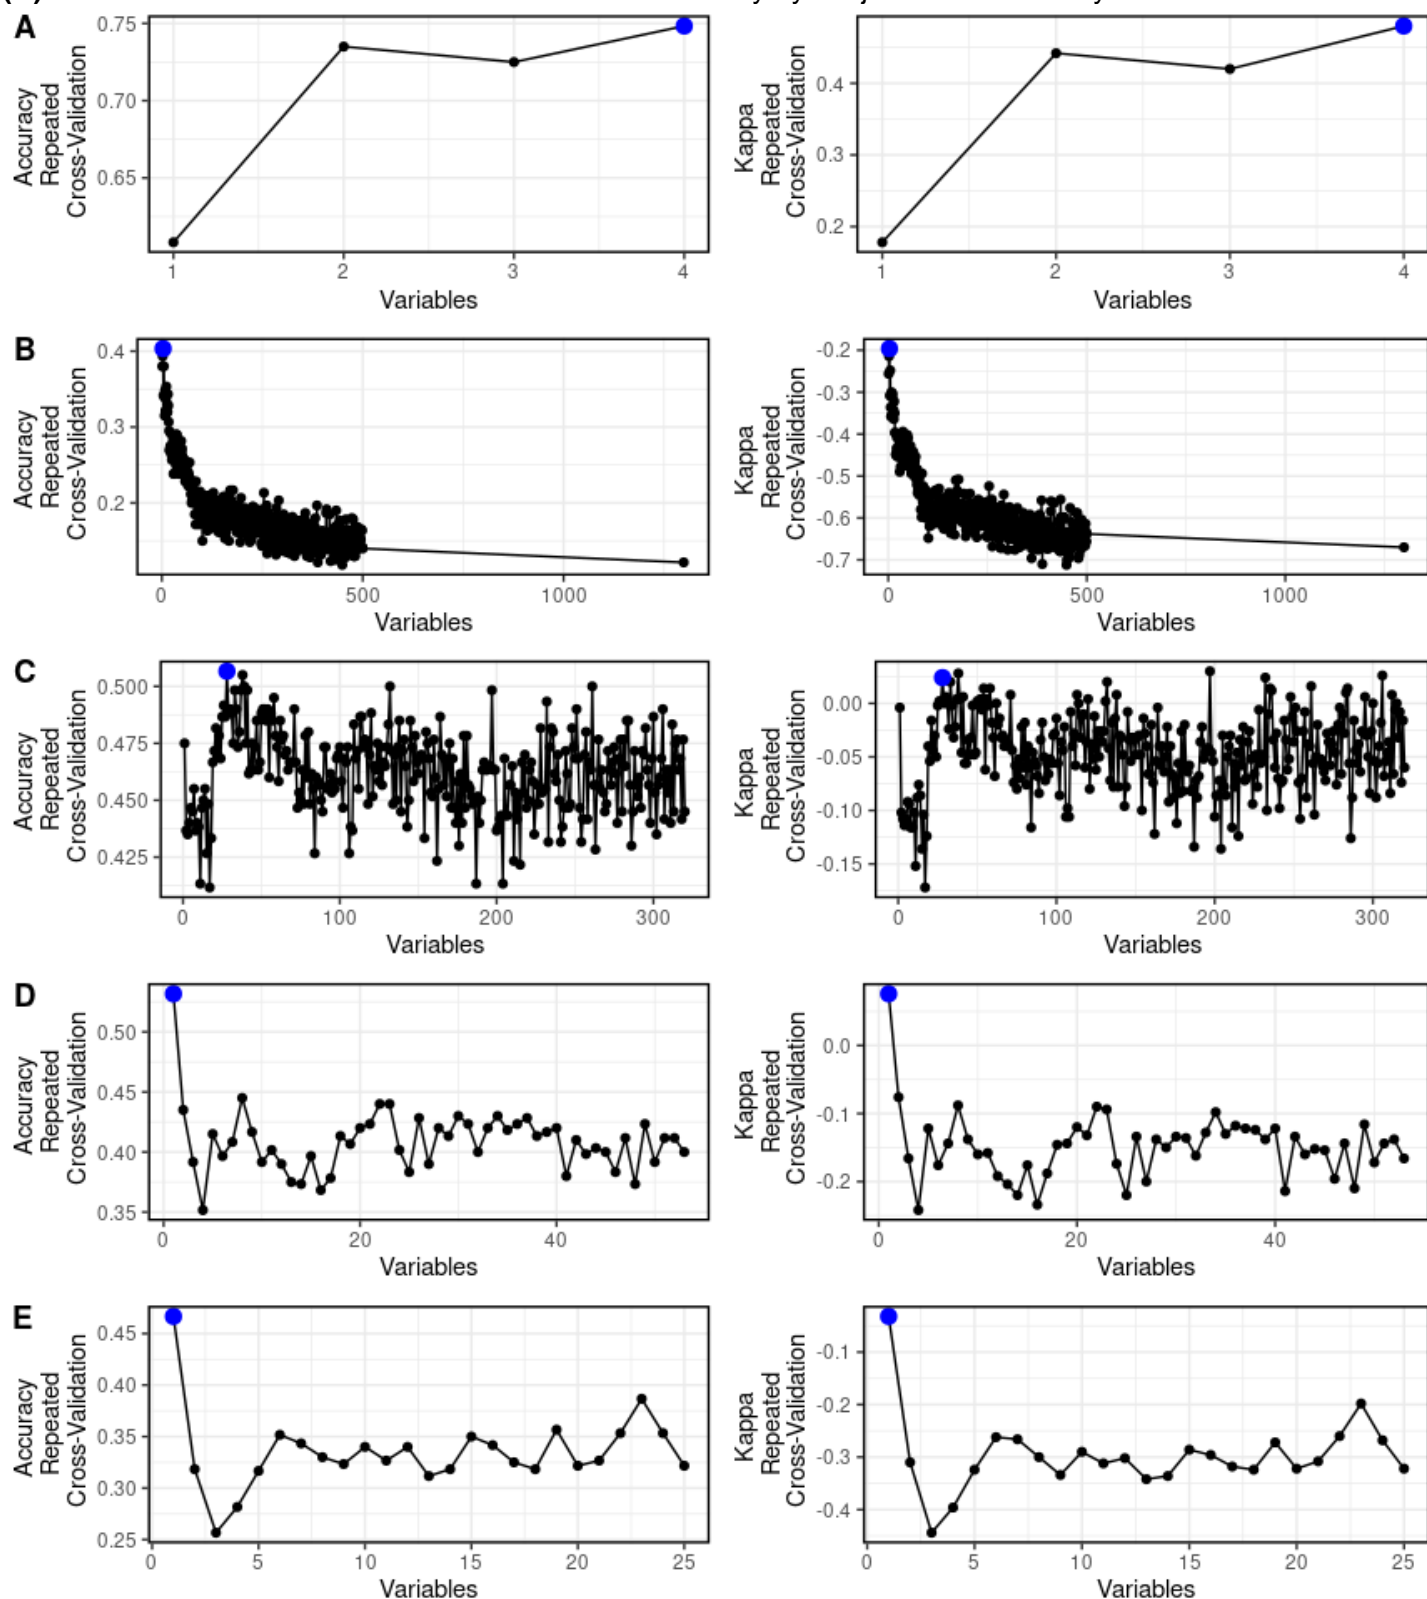

**Figure S3, Related to Figure 3: Accuracy and Cohen's Kappa for each individual recursive random forest models for (A) Macronutrients, (B), ASVs, (C) fecal metabolome, (D) plasma metabolome, and (E) urine metabolome.**

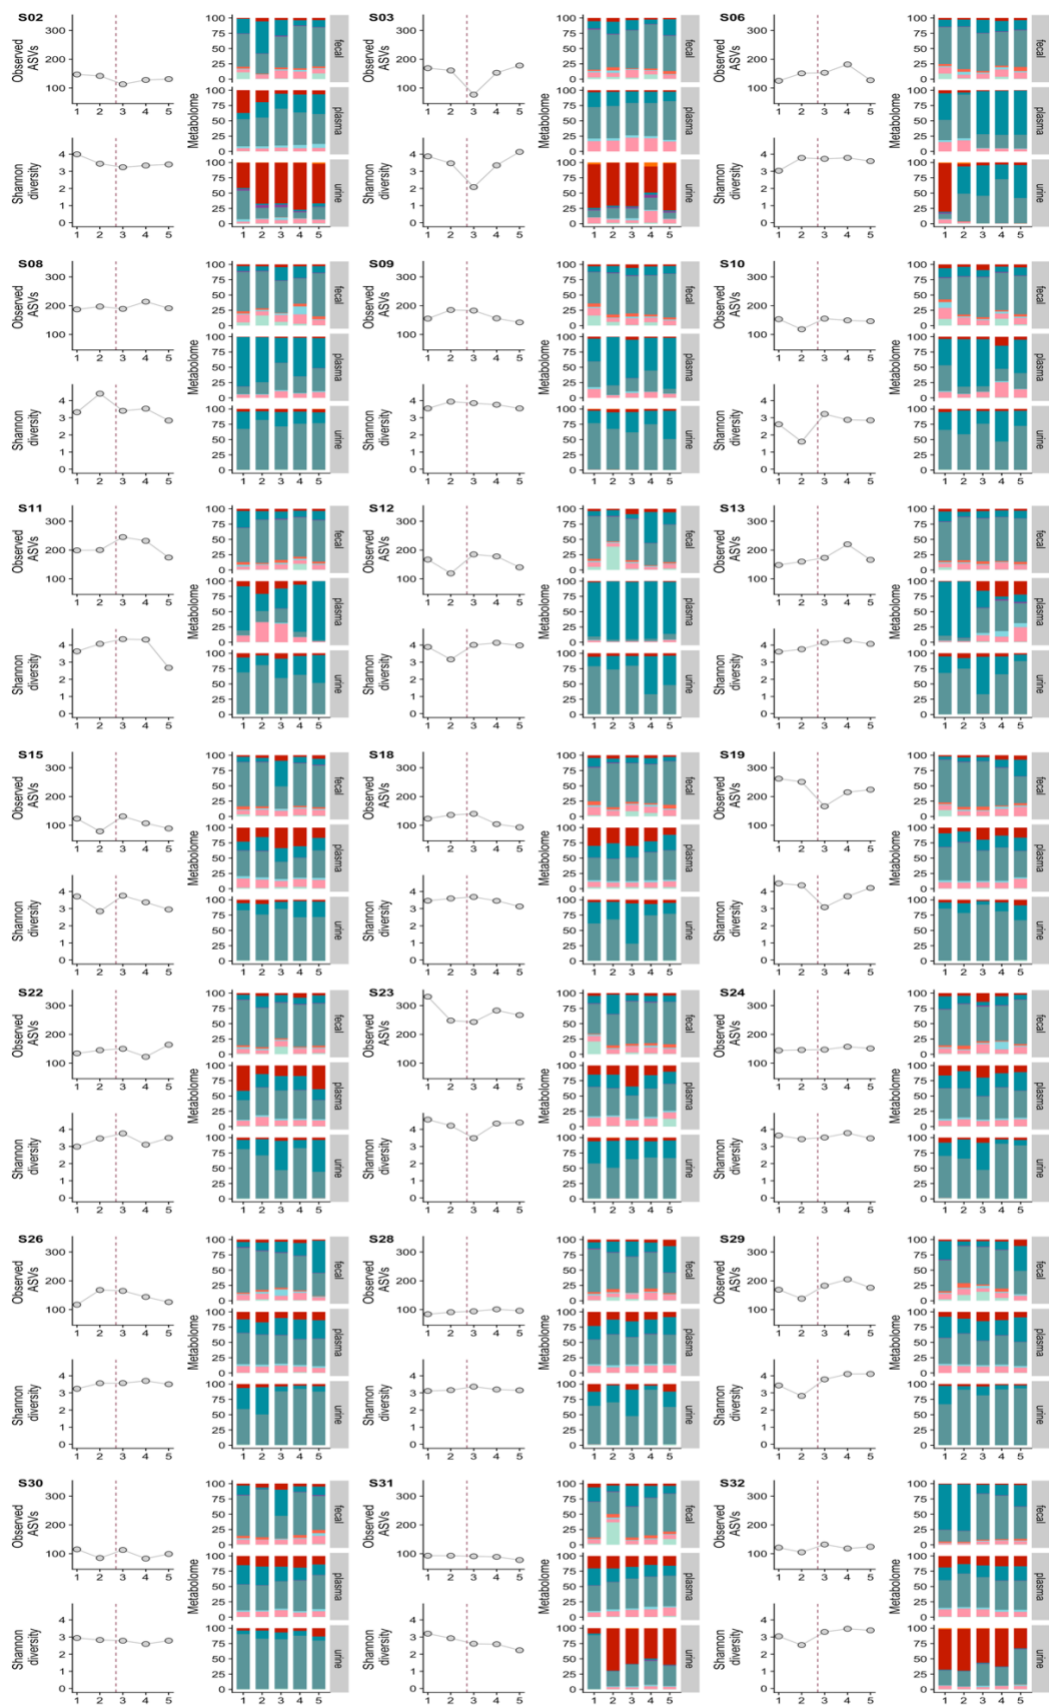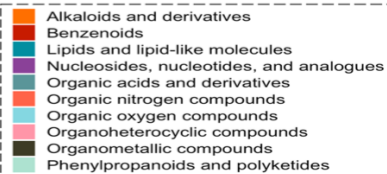

**Figure S4, Related to Figure 4: MISO participants personalized temporal variation in observed ASVs, Shannon diversity, and metabolome profiles.** Observed ASVs and Shannon diversity were determined using 16S amplicon sequencing of fecal samples.
